# Supplementary material for: On the challenges of drawing conclusions from p-values just below 0.05
Source: PeerJ. 2015 Jul 30;3:e1142. doi: 10.7717/peerj.1142 (PMC4525697; doi:10.7717/peerj.1142)
Supplement: Supplemental Information 1 [file peerj-03-1142-s001.xlsx]

## Sheet: Percentages Figure 23
	CDB (papers with specific p-value in abstract)			CD (all papers with abstract)			100*CDB/CD			Ratios
p values	1990-1997	1998-2005	2006-2013	1990-1997	1998-2005	2006-2013	1990-1997	1998-2005	2006-2013
0.001	7321	22928	56873	5713158	9132477	15832144	0.128143	0.25106	0.359225	2.62092
0.002	5620	16648	39490	5713158	9132477	15832144	0.0983694	0.182294	0.249429
0.003	4404	12941	31310	5713158	9132477	15832144	0.0770852	0.141703	0.197762
0.004	3662	10820	26046	5713158	9132477	15832144	0.0640976	0.118478	0.164513
0.005	3466	9674	22837	5713158	9132477	15832144	0.060667	0.10593	0.144245		3.95441	3.64461	3.15026
0.006	2854	8416	19921	5713158	9132477	15832144	0.0499549	0.0921546	0.125826
0.007	2420	7706	18304	5713158	9132477	15832144	0.0423584	0.0843802	0.115613
0.008	2391	7248	17633	5713158	9132477	15832144	0.0418508	0.0793651	0.111375
0.009	1953	6182	15190	5713158	9132477	15832144	0.0341842	0.0676925	0.095944
0.011	836	2871	8814	5713158	9132477	15832144	0.0146329	0.0314373	0.0556716	3.28996
0.012	1027	3550	10034	5713158	9132477	15832144	0.017976	0.0388723	0.0633774
0.013	1013	3268	9149	5713158	9132477	15832144	0.017731	0.0357844	0.0577875
0.014	1082	3330	8935	5713158	9132477	15832144	0.0189387	0.0364633	0.0564358
0.015	1139	3542	9210	5713158	9132477	15832144	0.0199364	0.0387847	0.0581728		1.53809	1.45605	1.39385
0.016	1030	3231	8841	5713158	9132477	15832144	0.0180286	0.0353792	0.0558421
0.017	912	2920	8298	5713158	9132477	15832144	0.0159632	0.0319738	0.0524124
0.018	881	2920	7997	5713158	9132477	15832144	0.0154205	0.0319738	0.0505112
0.019	701	2509	7320	5713158	9132477	15832144	0.0122699	0.0274734	0.0462351
0.021	498	1999	6467	5713158	9132477	15832144	0.00871672	0.0218889	0.0408473	3.63041
0.022	540	1934	5806	5713158	9132477	15832144	0.00945187	0.0211772	0.0366722
0.023	580	2179	6538	5713158	9132477	15832144	0.010152	0.0238599	0.0412957
0.024	582	2152	6308	5713158	9132477	15832144	0.010187	0.0235643	0.039843
0.025	954	2628	6929	5713158	9132477	15832144	0.0166983	0.0287764	0.0437654		1.26896	1.23016	1.18952
0.026	657	2214	6310	5713158	9132477	15832144	0.0114998	0.0242431	0.0398556
0.027	595	2118	6183	5713158	9132477	15832144	0.0104146	0.023192	0.0390535
0.028	630	2248	6220	5713158	9132477	15832144	0.0110272	0.0246154	0.0392872
0.029	569	1855	5628	5713158	9132477	15832144	0.00995947	0.0203121	0.0355479
0.031	404	1564	5185	5713158	9132477	15832144	0.0070714	0.0171257	0.0327498	3.87287
0.032	479	1622	5298	5713158	9132477	15832144	0.00838415	0.0177608	0.0334636
0.033	371	1542	4774	5713158	9132477	15832144	0.00649378	0.0168848	0.0301538
0.034	482	1720	5237	5713158	9132477	15832144	0.00843666	0.0188339	0.0330783
0.035	626	2018	5750	5713158	9132477	15832144	0.0109572	0.022097	0.0363185		1.13489	1.09074	1.11232
0.036	575	1906	5646	5713158	9132477	15832144	0.0100645	0.0208706	0.0356616
0.037	545	1907	5338	5713158	9132477	15832144	0.00953938	0.0208815	0.0337162
0.038	504	1850	5269	5713158	9132477	15832144	0.00882174	0.0202574	0.0332804
0.039	431	1582	4908	5713158	9132477	15832144	0.00754399	0.0173228	0.0310002
0.041	342	1349	4280	5713158	9132477	15832144	0.00598618	0.0147715	0.0270336	3.95145
0.042	359	1401	4496	5713158	9132477	15832144	0.00628374	0.0153409	0.0283979
0.043	395	1494	4480	5713158	9132477	15832144	0.00691386	0.0163592	0.0282969
0.044	349	1273	3974	5713158	9132477	15832144	0.00610871	0.0139393	0.0251008
0.045	528	1833	5154	5713158	9132477	15832144	0.00924182	0.0200712	0.032554		2.19887	3.34122	4.57275
0.046	523	1854	5282	5713158	9132477	15832144	0.00915431	0.0203012	0.0333625
0.047	504	1765	5088	5713158	9132477	15832144	0.00882174	0.0193266	0.0321372
0.048	473	1827	5169	5713158	9132477	15832144	0.00827913	0.0200055	0.0326488
0.049	419	1608	4695	5713158	9132477	15832144	0.00733395	0.0176075	0.0296549
0.051	159	419	1078	5713158	9132477	15832144	0.00278305	0.00458802	0.00680893	1.90011
0.052	191	497	1122	5713158	9132477	15832144	0.00334316	0.00544212	0.00708685
0.053	187	477	1115	5713158	9132477	15832144	0.00327315	0.00522312	0.00704263
0.054	224	481	1103	5713158	9132477	15832144	0.00392077	0.00526692	0.00696684
0.055	238	520	1068	5713158	9132477	15832144	0.00416582	0.00569396	0.00674577		2.27214	1.93753	1.79196
0.056	242	524	1062	5713158	9132477	15832144	0.00423584	0.00573776	0.00670787
0.057	225	513	970	5713158	9132477	15832144	0.00393828	0.00561731	0.00612678
0.058	169	481	916	5713158	9132477	15832144	0.00295808	0.00526692	0.0057857
0.059	135	399	886	5713158	9132477	15832144	0.00236297	0.00436902	0.00559621
0.061	69	227	500	5713158	9132477	15832144	0.00120774	0.00248563	0.00315813	2.40927
0.062	66	238	562	5713158	9132477	15832144	0.00115523	0.00260608	0.00354974
0.063	94	255	624	5713158	9132477	15832144	0.00164532	0.00279223	0.00394135
0.064	74	231	563	5713158	9132477	15832144	0.00129526	0.00252943	0.00355606
0.065	127	270	683	5713158	9132477	15832144	0.00222294	0.00295648	0.00431401		1.56426	1.40556	1.29928
0.066	87	249	590	5713158	9132477	15832144	0.0015228	0.00272653	0.0037266
0.067	100	274	634	5713158	9132477	15832144	0.00175035	0.00300028	0.00400451
0.068	82	271	544	5713158	9132477	15832144	0.00143528	0.00296743	0.00343605
0.069	80	210	501	5713158	9132477	15832144	0.00140028	0.00229949	0.00316445
0.071	34	136	445	5713158	9132477	15832144	0.000595117	0.00148919	0.00281074	2.90063
0.072	56	171	457	5713158	9132477	15832144	0.000980193	0.00187244	0.00288653
0.073	60	144	438	5713158	9132477	15832144	0.00105021	0.00157679	0.00276652
0.074	53	187	426	5713158	9132477	15832144	0.000927683	0.00204764	0.00269073
0.075	65	219	513	5713158	9132477	15832144	0.00113772	0.00239804	0.00324024		1.25758	1.26135	1.19958
0.076	67	209	458	5713158	9132477	15832144	0.00117273	0.00228854	0.00289285
0.077	61	154	412	5713158	9132477	15832144	0.00106771	0.00168629	0.0026023
0.078	48	199	435	5713158	9132477	15832144	0.000840166	0.00217904	0.00274757
0.079	54	164	419	5713158	9132477	15832144	0.000945187	0.00179579	0.00264651
0.081	33	123	335	5713158	9132477	15832144	0.000577614	0.00134684	0.00211595	3.04087
0.082	43	133	348	5713158	9132477	15832144	0.000752649	0.00145634	0.00219806
0.083	35	138	405	5713158	9132477	15832144	0.000612621	0.00151109	0.00255809
0.084	35	151	372	5713158	9132477	15832144	0.000612621	0.00165344	0.00234965
0.085	52	154	409	5713158	9132477	15832144	0.00091018	0.00168629	0.00258335		1.26518	1.27282	1.2291
0.086	39	154	392	5713158	9132477	15832144	0.000682635	0.00168629	0.00247598
0.087	50	154	378	5713158	9132477	15832144	0.000875173	0.00168629	0.00238755
0.088	44	119	325	5713158	9132477	15832144	0.000770152	0.00130304	0.00205279
0.089	65	129	373	5713158	9132477	15832144	0.00113772	0.00141254	0.00235597
0.091	26	91	284	5713158	9132477	15832144	0.00045509	0.000996444	0.00179382	3.13013
0.092	36	91	286	5713158	9132477	15832144	0.000630124	0.000996444	0.00180645
0.093	33	109	318	5713158	9132477	15832144	0.000577614	0.00119354	0.00200857
0.094	33	94	270	5713158	9132477	15832144	0.000577614	0.00102929	0.00170539
0.095	50	128	376	5713158	9132477	15832144	0.000875173	0.00140159	0.00237492
0.096	44	124	323	5713158	9132477	15832144	0.000770152	0.00135779	0.00204015
0.097	34	135	314	5713158	9132477	15832144	0.000595117	0.00147824	0.00198331
0.098	38	120	294	5713158	9132477	15832144	0.000665131	0.00131399	0.00185698
0.099	19	94	250	5713158	9132477	15832144	0.000332566	0.00102929	0.00157907
	60382	190506	497190
