# Supplementary material for: On the challenges of drawing conclusions from p-values just below 0.05
Source: PeerJ. 2015 Jul 30;3:e1142. doi: 10.7717/peerj.1142 (PMC4525697; doi:10.7717/peerj.1142)
Supplement: Supplemental Information 2 [file peerj-03-1142-s002.xlsx]

## Sheet: close reconstruction using powe
no pub bias																	Power	0.5	Pub Bias:	1	Ratio H0/H1	0
					only true effects			True effects and Type 1 errors									Published		Total Performed Studies 50% power 100% pub bias
	1990 55% power p in 0.041-0.049	2013 42% power, p in 0.041-0.049	% reporting p-values	% reporting p-values	1990	2013	2013/1990	1990 true	2013 true	1990 Type 1 error	2013 Type 1 error	total p< 0.05 1990	total <0.05 2013		ratio N/T 1990	ratio N/T 2013	Total 1990 H1 True	Total 2013 H1 True	1990	2013	Total 1990 H0 true	Total 2013 H0 True		1990/2013Ratio		observed
p00	0.29855	0.19926	0.01	0.1	1676.41	46064.4	27.4781	1676.41	46064.4	0	0	1676.41	46064.4	27.4781	0.29855	1.9926	561516	2311772	1123032	4623544	0	0		6.67426		6.17
p01	0.0854	0.072197	0.01	0.1	479.535	16690.3	34.8052	479.535	16690.3	0	0	479.535	16690.3	34.8052	0.0854	0.72197	561516	2311772	1123032	4623544	0	0		8.45398		7.83
p02	0.056119	0.050601	0.01	0.1	315.117	11697.8	37.1221	315.117	11697.8	0	0	315.117	11697.8	37.1221	0.056119	0.50601	561516	2311772	1123032	4623544	0	0		9.01673		9.63
p03	0.042212	0.03975	0.01	0.1	237.027	9189.29	38.769	237.027	9189.29	0	0	237.027	9189.29	38.769	0.042212	0.3975	561516	2311772	1123032	4623544	0	0		9.41675		9.21
p04	0.03388	0.033	0.01	0.1	190.242	7628.85	40.1008	190.242	7628.85	0	0	190.242	7628.85	40.1008	0.03388	0.33	561516	2311772	1123032	4623544	0	0		9.74026		11.28
					observed
					1770	44970
					462	14885
					268	10630
					240	9108
					178	8250
	based on appr. 55% power	based on appr. 50% power	based on appr. 47.5% power	based on appr. 42% power	based on appr. 35% power
	1990 % p in 0.041-0.049	1990 % p in 0.041-0.049	1990 % p in 0.041-0.049	1990 % p in 0.041-0.049	1990 % p in 0.041-0.049
	0.29855	0.25713	0.237526	0.19926	0.14967
	0.0854	0.08091	0.0783026	0.072197	0.06202
	0.056119	0.05453	0.0534426	0.050601	0.04522
	0.042212	0.04172	0.04124	0.03975	0.03649
	0.03388	0.03393	0.0337614	0.033	0.0309
	based on appr. 60% power	based on appr. 57,5% power	based on appr. 45% power	based on appr. 40% power
	0.34469	0.322231	0.218109	0.182397
	0.0889036	0.0873905	0.0753775	0.0690455
	0.0568962	0.0566399	0.0521267	0.0490096
	0.0420424	0.0422108	0.0405829	0.0388349
	0.0332871	0.0336402	0.0334518	0.03245

## Sheet: reconstruction phack 1990
no pub bias																			Power	0.5	Pub Bias:	1	Ratio H0/H1	1
					only true effects			True effects and Type 1 errors											Published		Total Performed Studies 50% power 100% pub bias					1990/2013Ratio
	1990 % p in 0.041-0.049	2013% p in 0.041-0.049	% reporting p-values	% reporting p-values	1990	2013	2013/1990	1990 true	2013 true	Type 1 error rate 1990	1990 Type 1 error	Type 1 error rate 2013	2013 Type 1 error	total p< 0.05 1990	total <0.05 2013		ratio N/T 1990	ratio N/T 2013	Total 1990 H1 True	Total 2013 H1 True	1990	2013	Total 1990 H0 true	Total 2013 H0 True				observed
p00	0.322231	0.322231	0.01	0.064	1809.38	47675.1	26.3489	1809.38	47675.1	0.008	89.8426	0.015	4438.6	1899.22	52113.7	27.4396	0.338231	2.25428	561516	2311772	1123032	4623544	1123032	4623544		6.66491		6.17
p01	0.0873905	0.0873905	0.01	0.064	490.712	12929.7	26.3489	490.712	12929.7	0.008	89.8426	0.02	5918.14	580.554	18847.9	32.4653	0.103391	0.815299	561516	2311772	1123032	4623544	1123032	4623544		7.88563		7.83
p02	0.0566399	0.0566399	0.01	0.064	318.042	8380.07	26.3489	318.042	8380.07	0.008	89.8426	0.025	7397.67	407.885	15777.7	38.6818	0.0726399	0.682496	561516	2311772	1123032	4623544	1123032	4623544		9.3956		9.63
p03	0.0422108	0.0422108	0.01	0.064	237.02	6245.23	26.3489	237.02	6245.23	0.008	89.8426	0.025	7397.67	326.863	13642.9	41.7389	0.0582108	0.590149	561516	2311772	1123032	4623544	1123032	4623544		10.1381		9.21
p04	0.0336402	0.0336402	0.01	0.064	188.895	4977.19	26.3489	188.895	4977.19	0.008	89.8426	0.027	7989.48	278.738	12966.7	46.5192	0.0496402	0.560898	561516	2311772	1123032	4623544	1123032	4623544		11.2993		11.28
					observed
					1770	44970
					462	14885
					268	10630
					240	9108
					178	8250
	based on appr. 55% power	based on appr. 50% power	based on appr. 47.5% power	based on appr. 42% power	based on appr. 35% power
	1990 % p in 0.041-0.049	1990 % p in 0.041-0.049	1990 % p in 0.041-0.049	1990 % p in 0.041-0.049	1990 % p in 0.041-0.049
	0.29855	0.25713	0.237526	0.19926	0.14967
	0.0854	0.08091	0.0783026	0.072197	0.06202
	0.056119	0.05453	0.0534426	0.050601	0.04522
	0.042212	0.04172	0.04124	0.03975	0.03649
	0.03388	0.03393	0.0337614	0.033	0.0309
	based on appr. 60% power	based on appr. 57,5% power	based on appr. 45% power	based on appr. 40% power
	0.34469	0.322231	0.218109	0.182397
	0.0889036	0.0873905	0.0753775	0.0690455
	0.0568962	0.0566399	0.0521267	0.0490096
	0.0420424	0.0422108	0.0405829	0.0388349
	0.0332871	0.0336402	0.0334518	0.03245

## Sheet: reconstruction change H0-H1
no pub bias																			Power	0.5	Pub Bias:	0.2	Ratio H0/H1 1990	0.1	Ratio H0/H1 2013	10
					only true effects			True effects and Type 1 errors											Published		Total Performed Studies 50% power 100% pub bias					1990/2013Ratio
	1990 % p in 0.041-0.049	2013% p in 0.041-0.049	% reporting p-values	% reporting p-values	1990	2013	2013/1990	1990 true	2013 true	Type 1 error rate 1990	1990 Type 1 error	Type 1 error rate 2013	2013 Type 1 error	total p< 0.05 1990	total <0.05 2013		ratio N/T 1990	ratio N/T 2013	Total 1990 H1 True	Total 2013 H1 True	1990	2013	Total 1990 H0 true	Total 2013 H0 True				observed
p00	0.322231	0.322231	0.01	0.055	1814.23	41064.6	22.6347	1814.23	41064.6	0.008	1.80167	0.008	4078.03	1816.03	45142.6	24.8578	0.322551	1.94827	563023	2317062	225209	926825	22520.9	9268248		6.04019		6.17
p01	0.0873905	0.0873905	0.01	0.055	492.029	11136.9	22.6347	492.029	11136.9	0.008	1.80167	0.008	4078.03	493.831	15214.9	30.81	0.0877105	0.656648	563023	2317062	225209	926825	22520.9	9268248		7.48653		7.83
p02	0.0566399	0.0566399	0.01	0.055	318.896	7218.11	22.6347	318.896	7218.11	0.008	1.80167	0.008	4078.03	320.698	11296.1	35.2236	0.0569599	0.48752	563023	2317062	225209	926825	22520.9	9268248		8.55899		9.63
p03	0.0422108	0.0422108	0.01	0.055	237.656	5379.27	22.6347	237.656	5379.27	0.008	1.80167	0.008	4078.03	239.458	9457.3	39.4946	0.0425308	0.408159	563023	2317062	225209	926825	22520.9	9268248		9.5968		9.21
p04	0.0336402	0.0336402	0.01	0.055	189.402	4287.06	22.6347	189.402	4287.06	0.008	1.80167	0.008	4078.03	191.204	8365.09	43.7496	0.0339602	0.361021	563023	2317062	225209	926825	22520.9	9268248		10.6307		11.28
					observed
					1770	44970
					462	14885
					268	10630
					240	9108
					178	8250
	based on appr. 55% power	based on appr. 50% power	based on appr. 47.5% power	based on appr. 42% power	based on appr. 35% power
	1990 % p in 0.041-0.049	1990 % p in 0.041-0.049	1990 % p in 0.041-0.049	1990 % p in 0.041-0.049	1990 % p in 0.041-0.049
	0.29855	0.25713	0.237526	0.19926	0.14967
	0.0854	0.08091	0.0783026	0.072197	0.06202
	0.056119	0.05453	0.0534426	0.050601	0.04522
	0.042212	0.04172	0.04124	0.03975	0.03649
	0.03388	0.03393	0.0337614	0.033	0.0309
	based on appr. 60% power	based on appr. 57,5% power	based on appr. 45% power	based on appr. 40% power
	0.34469	0.322231	0.218109	0.182397
	0.0889036	0.0873905	0.0753775	0.0690455
	0.0568962	0.0566399	0.0521267	0.0490096
	0.0420424	0.0422108	0.0405829	0.0388349
	0.0332871	0.0336402	0.0334518	0.03245
